# Supplementary material for: A novel European H5N8 influenza A virus has increased virulence in ducks but low zoonotic potential
Source: PubMed Central journal article supplement (PMC6053424; doi:10.1038/s41426-018-0130-1), 2018-07-19

## 1 **Supplemental information**

### 2 **Supplemental material and methods**

3

#### 4 *Experimental infection of ducks, geese and chicken with DE14-H5N8A and DE16-H5N8B*

5         White leghorn chicken (*Gallus gallus var. domesticus*) were hatched and raised at the  
6 FLI from SPF-eggs purchased from VALO BioMedia, Germany. One day old Pekin  
7 ducklings (*Anas platyrhynchos var. domesticus*) and Muscovy ducklings (*Cairina moschata*)  
8 were obtained from commercial sources. Adult 6-7 month old throughbreed ducks (*Anas*  
9 *platyrhynchos var. domesticus*, “Rouen Claire”) and geese (*Anser anser var. domesticus*,  
10 ”Pommeranian goose”) were obtained from a local breeder and tested AIV-seronegative by  
11 ELISA (ID-Vet, France) before inoculation. Animal numbers and group assignment are  
12 summarized in table S2. Intravenous pathogenicity index testing (IVPI) was done according to  
13 standard procedures <sup>1</sup>. Intramuscular pathogenicity index (IMPI) testing in one week old  
14 Pekin and Muscovy ducklings followed the procedure of the IVPI in chicken, but with  
15 injection of virus into the caudal femoral muscles and subsequent clinical scoring for 10 days.  
16 In two subsequent experiments aadult ducks were inoculated oculo-nasally (o.n.) with 10<sup>6</sup>  
17 TCID<sub>50</sub> of either DE14-H5N8A or DE16-H5N8B. During the first infection experiment geese  
18 (n=10) were simultaneously infected with DE14-H5N8A and housed together with inoculated  
19 ducks. Virus replication was monitored by pharyngeal- and cloacal-swabs on day 2, 4, 7, 10  
20 and 14 and on day 2 and 4 2 animals were sacrificed to investigate birds pathologically.  
21 During the second trial with DE16-H5N8B, monitoring was intensified during acute phase  
22 with taking swab samples daily form day 1-7 p.i. and subsequently on day 10 and 16 p.i. On  
23 day one after infection 2 animals from the same waterfowl species as well as adult SPF-  
24 chicken (n=4 for DE14-H5N8A and n=10 for DE16-H5N8B) were housed together with the

25 inoculated waterfowl and served as sentinels. Animals were monitored daily for clinical signs  
26 for a period of up to 21 days. Animals that suffered severe disease like pronounced lethargy or  
27 apathy were sacrificed before and considered dead on the subsequent day. The intramuscular  
28 pathogenicity and clinical scoring indices (IMPI) were calculated based on the following  
29 parameters: healthy (0), ill (1) (exhibiting one of the following clinical signs: somnolence,  
30 labored breathing, cyanosis, neurological symptoms), (2) severely sick (showing at least two  
31 of the previous clinical signs) or (3) dead. Oropharyngeal and cloacal swabs were taken at  
32 indicated days post infection (dpi) or as combined oropharyngeal/cloacal swabs prior to  
33 infection and stored in 1 ml medium (mixture of equal volumes of Eagle MEM (Hanks'  
34 balanced salts solution), 2mM L-Gln, nonessential amino acids, adjusted to 850 mg/L  
35 NaHCO<sub>3</sub>, 120 mg/L sodium pyruvate, 10% FBS, pH 7.2). All animals that died during the  
36 o.n. inoculation experiments were subjected to pathological investigation and subsequent  
37 sampling of organs for virological and histological analyses. In case of waterfowl inoculated  
38 with DE14-H5N8A, with no spontaneous deaths, two randomly selected animals from each  
39 species were euthanized on day 2 and 4 for investigations.

#### 40 *Experimental infection of mice and ferrets with DE16-H5N8B*

41 **Mice:** To determine the mouse lethal dose 50 (MLD<sub>50</sub>), based on TCID<sub>50</sub>/mL of DE-  
42 H5N8B, a total of 52 4 week-old BALB/c mice were used. Table S3 summarizes mice  
43 numbers per dosage groups used. Mice were anesthetized by inhalation of 5 % isoflurane and  
44 inoculated intranasally (i.n.) with 30 µL 10-fold serial dilutions from 10<sup>2</sup> to 10<sup>6</sup>  
45 TCID<sub>50</sub>/animal. Mice serving as control animals were manipulated the same way as  
46 inoculated animals, without receiving virus inoculum. The MLD<sub>50</sub> was calculated as log<sub>10</sub>  
47 TCID<sub>50</sub>/mL. All TCID<sub>50</sub> and MLD<sub>50</sub> calculations were performed using the method of  
48 Spearman and Kärber<sup>2,3</sup>. Mice were monitored daily for weight loss, clinical signs and  
49 mortality for 14 days. The percent weight loss was calculated from the original starting

50 weight. Mice showing more than 25% of body weight loss (compared to body weight mean  
51 values at the specific age, provided by the supplier of animals) were considered to have  
52 reached the experimental end point and were euthanized. To determine virus titres in various  
53 tissues, three mice of each group were euthanized on 3 dpi, in addition three mice from the  
54 groups  $10^3$ ,  $10^5$ ,  $10^6$  were euthanized on 6 dpi, and organs (i.e., lungs, conchae, heart, and  
55 brains) were harvested for histopathological- and virological examinations.

56 **Ferrets:** 3-6 month-old healthy and influenza-negative ferrets (*Mustela putorius furo*)  
57 were reared at the FLI and housed in cages during the experiment. Cages were separated by  
58 stainless-steel grids to prevent direct contact. Eight ferrets were anesthetized by inhalation of  
59 5 % isoflurane and infected intranasally with  $10^6$  TCID<sub>50</sub> of the DE16-H5N8B virus in a total  
60 volume of 50  $\mu$ L. Four ferrets served as transmission sentinels by direct contact (in a 1:1  
61 setting). Animals were monitored daily for clinical signs (nasal discharge, labored breathing,  
62 reduced activity, fever, body weight loss, or neurological symptoms); they were weighed  
63 every second day, and body temperatures were recorded by the use of subcutaneous  
64 implantable temperature-logging devices (Plexx, Elst, The Netherlands). Blood samples were  
65 drawn from the Vena saphena under light anaesthesia with isoflurane prior to infection or on  
66 the day of euthanasia, respectively. Nasal washes were collected every other day from all  
67 ferrets to measure virus replication by applying 1 ml phosphate-buffered saline (PBS) into  
68 each nostril. From genome positive nasal washing samples virus titration attempts were  
69 performed using MDCK cell cultures. Four inoculated animals were euthanized on 3 dpi,  
70 dissected and spleens, tracheas, lungs (divided into left and right parts), conchae, cerebellum,  
71 and cerebrum were removed and stored at -70 °C until further use.

## 72 *Organ homogenization*

73 Tissue samples of individual animals were re-suspended in 1 mL of medium (mixture  
74 of equal volumes of Eagle MEM (Hanks' balanced salts solution) and Eagle MEM (Earle's

75 balanced salts solution), 2mM L-Glutamine, nonessential amino acids, adjusted to 850 mg/L  
76 NaHCO<sub>3</sub>, 120 mg/L sodium pyruvate, 10% fetal bovine serum (FBS), pH 7.2) supplemented  
77 with 10 % FBS plus antibiotics (1% penicillin-streptomycin). A single stainless steel bead (5  
78 mm) per organ sample was added and samples were homogenized in a 2 ml collection tube  
79 for 2 min in a TissueLyser (Qiagen, Hilden, Germany).

#### 80 *Quantitative Real-time RT-PCR*

81 Viral RNA was extracted from 200 µl of the supernatant of organ homogenates or  
82 swab samples using the MagAttract® Virus Mini M48 kit (Qiagen, Hilden, Germany)  
83 according to the manufacturer's instructions on a Biosprint 96 platform (Qiagen).

84 Virus quantification was performed as cell culture titration and/or based on  
85 quantitative real-time reverse transcriptase PCR (RT-qPCR) of virus genome. For ferret and  
86 mouse experiment samples, an assay based on viral genome segment 2 (PB1) was established.  
87 The primer and probe set of the generic PB1 assay (summarized in table S4) was used to  
88 determine the quantification cycle (Cq) in swabs, nasal washes, and organs using the one-step  
89 RT-qPCR Kit qScript™ XLT One-Step RT-qPCR ToughMix® (Quantabio, Beverly USA).  
90 The RT-qPCR assay was optimized for using a total volume of 12.5 µl. Briefly, for a single  
91 well 1.75 µl RNase-free water, 6.25 µl 2x RT-PCR buffer, and 1.0 µl primer-probe-mix for  
92 template detection as well as 1.0 µl primer-probe-mix for detection of the internal extraction  
93 control RNA, were pooled as a master mix. Finally, 2.5 µl RNA template was added and the  
94 reaction was run on an CFX96 machine. Genome copy numbers per µl were determined by  
95 absolute quantification via droplet PCR technique and log<sub>10</sub> dilution standards were used  
96 within the subsequent RT-qPCR assay. The generated standard curve exhibited the following  
97 characterizing values:  $y = -3.519x + 36.474$ ;  $R^2 = 0.999$ .

98 Avian sample analysis was performed using a segment 7 (M) based RT-qPCR as  
99 previously described <sup>4</sup>. A standard curve for virus quantification was generated using

100 extracted viral RNA from diluted HPAIV H5N8 suspensions with known infectivity titer by  
101 RT-qPCR targeting the M gene. To relate M-specific Cq values to viral infectivity in the  
102 examined sample, Cq values from these extracts were plotted on the generated standard curve  
103 linking infectivity with Cq values.

#### 104 *Histopathology and immunohistochemistry*

105 Tissues were sampled in 4 % neutral buffered formaldehyde, processed and embedded in  
106 paraffin wax using a Leica ASP 300S fully enclosed tissue processor (Leica Biosystems,  
107 Nussloch, Germany), sectioned at 2-4 µm thickness using a Hyrax M55 electronic rotary  
108 microtome (Carl Zeiss Microimaging GmbH, Jena, Germany), mounted on Superfrost plus  
109 glass slides (Menzel Gläser, Braunschweig, Germany), stained with hematoxylin and eosin  
110 using a Medite TST 44.000C automatic tissue stainer (Medite, Burgdorf, Germany; Romeis  
111 Mikroskopische Technik. Editors: Mulisch Maria, Welsch Ulrich. 18th Edition 2010  
112 Spektrum Akademischer Verlag, Heidelberg), and screened for histopathological changes  
113 using an Axio Imager M2 microscope equipped with 10x, 20x, and 40x Plan Neofluar  
114 objectives, and a AxioCam ICc3 3.3 megapixel digital camera (Carl Zeiss Microscopy GmbH,  
115 Jena, Germany). The tissues of ducks and chicken were semi-quantitatively assessed for  
116 necrosis and / or necrotizing inflammation as well as lymphatic apoptosis, necrosis and / or  
117 depletion on a 0 to 3 severity scale: 0 = no obvious lesion; 1 = mild, 2 = moderate, 3 = severe  
118 lesion(s).

119 Immunohistochemistry was performed on serial sections to detect influenza A virus-antigen  
120 using the avidin-biotin-peroxidase-complex method (Vectastain PK 6100, Vector,  
121 Burlingame, CA, USA) with citric buffer (10mM, pH 6,0) pre-treatment, a polyclonal rabbit  
122 anti- influenza A FPV/Rostock/34-virus-nucleoprotein antiserum (diluted 1:750)<sup>5</sup>, 3-amino-  
123 9-ethyl-carbazol as chromogen (Agilent Technologies, Santa Clara, CA USA) and  
124 hematoxylin counterstain. The specificity of the immunohistochemical reaction was

125 confirmed by the use of negative tissues from mock-infected mice from this experiment,  
126 negative tissues from an archival of diagnostic cases of non-infected chicken, of a non-  
127 infected ferret (P17-348), as well as validated positive avian tissues from the recent H5N8  
128 outbreak <sup>6</sup>. As negative controls, serial sections were treated with rabbit serum instead of the  
129 primary polyclonal antiserum. The distribution of influenza A virus nucleoprotein was semi-  
130 quantitatively assessed for each organ by scoring on a 0 to 3 severity scale: 0 = negative; 1=  
131 focal or oligofocal, 2= multifocal, 3= coalescing to diffuse immune-reactive nuclei. This  
132 grading was subdivided for endothelial cells and parenchymal cells, respectively for chicken  
133 and ducks.

#### 134 *Serology*

135 Serum samples from animals were heat-inactivated at 56 °C for 30 min and analyzed  
136 by means of a commercial enzyme-linked immunosorbent assay (ELISA) for the presence of  
137 antibodies against IAV nucleoprotein (NP) (ID Screen® Influenza A Antibody Competition  
138 ELISA kit, ID-vet, Montpellier, France) and subtype H5 (ID Screen® Influenza H5 Antibody  
139 Competition ELISA kit, ID-vet, Montpellier, France) according to the manufacturer's  
140 instruction. HI assays against antigen of DE-R2472/2014A, and DE16-H5N8B were  
141 performed according to standard protocols <sup>1</sup>.

#### 142 *Infection of human lung tissue ex vivo.*

143 Tumor-free normal human lung tissue was cut into small pieces (weight approx. 0,1 –  
144 0,2 mg per piece) and incubated in RPMI 1640 medium overnight to wash off clinically  
145 applied antibiotics. Use of human explant tissue was approved by the ethics committee at the  
146 Charité clinic (projects EA2/050/08 and EA2/023/07) and written informed consent was  
147 obtained from all patients. The infection experiments were done in RPMI 1640 medium  
148 supplemented with 0.3 % bovine serum albumin, 2 mM L-glutamine and 25mM HEPES at 37

149 °C with 5 % CO<sub>2</sub> as described previously<sup>7-9</sup>. Human lung tissue explants were inoculated  
150 with  $2 \times 10^5$  PFU for replication analyses or  $1 \times 10^6$  PFU for ELISA and immunofluorescence  
151 studies of influenza viruses Pan H3N2, Thai H5N1 or DE16-H5N8B for 1.5 h. Excess virus  
152 was removed by washing with phosphate-buffered saline (PBS) and lung tissue was incubated  
153 for up to 48 hpi (hours post infection). For each experiment, tumor-free tissue specimens from  
154 at least three donors were analyzed. For replication analysis, at 1, 16, 24 and 48 hpi  
155 supernatants of infected lung tissue were harvested and viral titers were determined by  
156 standard plaque titration assay. For immunofluorescence and ELISA analyses, samples were  
157 prepared at 24 hpi.

#### 158 *Enzyme-Linked Immunosorbent Assay (ELISA).*

159 Supernatants of infected human lung tissue were collected 24 hpi, cleared of debris  
160 and stored at -80 °C. IL1 $\beta$  and IFN $\beta$  levels were measured according to the manufacturer's  
161 instructions with the "Human IL-1 beta/IL-1F2 DuoSet ELISA" (R&D Systems) or the  
162 "Human IFN-beta DuoSet ELISA" (R&D Systems), respectively.

#### 163 *Confocal microscopy*

164 Human lung tissue was infected with human Pan H3N2, Thai H5N1 or avian DE16-  
165 H5N8B and cultured for 24 h. Tissue samples were fixed and routinely paraffin embedded as  
166 described before [3]. After deparaffinization, slices were immunostained with fluorescently  
167 labeled Alexa Fluor 488 influenza A virion-specific antibody (Serotec, Puchheim, Germany)  
168 to detect virus-infected cells (green channel) and pro-SP-C (Chemicon, AB3786; red channel)  
169 to identify type II pneumocytes. An Alexa Fluor 594-labeled anti-rabbit F(ab')<sub>2</sub> fragment was  
170 applied as the secondary antibody. Nuclei were counterstained with DAPI (4',6-diamidino-2-  
171 phenylindole). Tissue sections were mounted in Mowiol and analyzed by spectral confocal  
172 microscopy using a 780 laser-scanning microscope (objectives 63x, zoom: 1.9; Plan-  
173 Neofluor/oil, NA 1.3, Plan-Apochromat/oil, NA 1.4; Zeiss).

174 *Statistical analysis*

175           Comparison of clinical scores was done initially by Kruskal-Wallis-Test to test for  
176 principal differences between groups and subsequently (post-hoc) Wilcoxon-Mann-Whitney  
177 tests for pairwise comparison using the Benjamini-Hochberg procedure. Data for replication  
178 analysis were presented as mean and standard error of the mean of at least three donors within  
179 independent experiments. Data for cytokine ELISA were presented as mean with standard  
180 deviation. Using GraphPad Prism 7 software, for replication analysis the Mann-Whitney U  
181 test was performed to delineate significant differences between data points. For cytokine  
182 ELISAs, statistical analysis was conducted by applying One-Way-Anova test and  
183 subsequently Dunn's multiple comparisons test using GraphPad Prism 7 software. For all  
184 assays, a p value  $\leq 0.05$  was considered significant, with  $p \leq 0.05$  depicted as (\*),  $p \leq 0.01$   
185 shown as (\*\*) and  $p \leq 0.0001$  shown as (\*\*\*\*).

186

187



188 **Supplemental figures legends**

189 **Supplemental figure S1: Viral shedding of Geese after HPAIV DE14-H5N8A infection**

190 Viral shedding was monitored by RT-qPCR from swabs taken from oro-pharynx (A) or cloaca  
191 (B) from Geese infected ocularly with DE14-H5N8A. Individual results of detected RNA  
192 copy numbers are given as virus equivalents (VE), calculated by using a set of standards  
193 applied in each run. All RT-PCR negative samples are depicted as 10 VE, i.e. under the  
194 detection limit. Individual inoculated animals (○) and sentinel animals (▼) as well as  
195 arithmetic mean and standard deviation of positive swab samples from inoculated birds (red  
196 dot) are shown. Numbers within the figures give number of virus positive -and number of  
197 total tested infected animals for each time point.

198

199 **Supplemental figure S2: Sero-reactivity of HP AIV H5N8 infected birds.**

200 Sera from Geese (A) or ducks (B) infected with DE14-H5N8A or ducks infected with DE16-  
201 H5N8B (C) were taken at indicated times after infection and tested by HI, using the  
202 homologous antigen.

203 **Supplemental figure S3: Viral load in organs of HPAIV H5N8 infected birds.**

204 Organs of ducks (D) and geese (G) infected with DE14-H5N8A were sampled from 2  
205 randomly selected animals on day 2 (d2) or day 4 (d4) after infection or from chickens that  
206 died on day 4 and 5 post contact respectively (A). Organ viral load after DE16-H5N8B  
207 infection was tested at the time of spontaneous death for indicated times after infection for  
208 ducks (B) and chicken (C). Individual results of detected RNA copy numbers are given as  
209 virus equivalents (VE), calculated by using a set of standards applied in each run. Blue line  
210 indicating the cut of value.

211 **Supplemental figure S4: Characteristic light microscopic findings in chicken infected**  
212 **with DE16-H5N8B.**

213 (A) Chicken, 3 d.p.i., brain. Moderate, subacute necrotizing polioencephalitis with infiltration  
214 of phagocytic microglia (arrow). (B) Chicken, 3 dpi., brain. Multiple foci (arrow) of influenza  
215 A nucleoprotein-immunoreactive neurons and glial cells. (C) Chicken, 3 dpi., liver. Mild,  
216 acute, hepatocellular necrosis (necrotizing hepatitis) characterized by small nests of shrunken  
217 hepatocytes with pyknotic and karyorrhectic nuclei (arrow) and few infiltratin heterophils. (D)  
218 Chicken, 3 dpi., liver. The influenza A virus-nucleoprotein-immunoreactivity displays a  
219 multifocal perivascular (star) and perisinusoidal pattern suggestive of endothelial and / or  
220 Kupffer cells and only scant, focal immunoreactive hepatocytes. (E) Chicken, 3 dpi.,  
221 pancreas. Mild, acute, pancreatic necrosis (necrotizing pancreatitis) characterized by small  
222 nests of either swollen and ruptured or shrunken hypereosinophilic exocrine pancreatocytes  
223 with pyknotic and karyorrhectic nuclei (arrow). (F) Chicken, 3 dpi., pancreas. Multiple foci  
224 (star) of influenza A virus-nucleoprotein-immunoreactive exocrine pancreatocytes. (G)  
225 Chicken, 7 dpi., spleen. Severe, acute, lymphatic apoptosis and necrosis characterized by  
226 cytoplasmic hypereosinophilia, nuclear pyknosis and karyorrhexis (arrow) within a follicular  
227 area (star) of the white pulp. (H) Chicken, 7 dpi., spleen. Especially the follicles (star) of the  
228 white pulp are surrounded by a rim of influenza A virus-nucleoprotein-immunoreactive cells  
229 interpreted as follicular dendritic cells and macrophages. Furthermore there is faintly  
230 immunoreactive debris within the follicles and oligofocal cells interpreted as macrophages /  
231 dendritic cells and endothelial cells within both white and red pulp. A, C, E, G Hematoxylin  
232 eosin, bar = 20µm. B, D, F, G Influenza A virus-nucleoprotein immunohistochemistry,  
233 avidin-biotin-peroxidase complex method with 3-amino-9-ethyl-carbazol as chromogen and  
234 hematoxylin counterstain, bar = 50 µm.

236 **Supplemental tables**

237 **Supplemental table S1: Histopathological lesions and DE16-H5N8B tissue tropism in**  
 238 **mice and ferrets.**

|                                                                    | Mouse<br>(DE16-<br>H5N8B) | Mouse<br>(control) | Ferrets<br>(DE16-<br>H5N8B) | Ferrets<br>(archival<br>control) |
|--------------------------------------------------------------------|---------------------------|--------------------|-----------------------------|----------------------------------|
| Brain. encephalitis <sup>1</sup>                                   | 4/5 (80%) <sup>3</sup>    | 0/3 (0%)           | 0/4 (0%)                    | 0/1 (0%)                         |
| Brain. influenza A virus-<br>nucleoprotein <sup>2</sup>            | 3/5 (60%)                 | 0/3 (0%)           | 0/4 (0%)                    | 0/1 (0%)                         |
| Heart. myocarditis <sup>1</sup>                                    | 1/5 (20 %)                | 0/3 (0%)           | 0/3 (0%)                    | 0/1 (0%)                         |
| Heart. influenza A virus-<br>nucleoprotein <sup>2</sup>            | 1/5 (20 %)                | 0/3 (0%)           | 0/3 (0%)                    | 0/1 (0%)                         |
| Lung. pneumonia <sup>1</sup>                                       | 3/5 (60%)                 | 0/3 (0%)           | 0/4 (0%)                    | 0/1 (0%)                         |
| Lung. influenza A virus-<br>nucleoprotein <sup>2</sup>             | 0/5 (0%)                  | 0/3 (0%)           | 0/4 (0%)                    | 0/1 (0%)                         |
| Nasal cavity. rhinitis <sup>1</sup>                                | n.d.                      | n.d.               | 2/4 (50%)                   | 0/1 (0%)                         |
| Nasal cavity. influenza A<br>virus-nucleoprotein <sup>2</sup>      | n.d.                      | n.d.               | 0/4 (0%)                    | 0/1 (0%)                         |
| Tonsilla palatina. influenza<br>A virus-nucleoprotein <sup>2</sup> | n.d.                      | n.d.               | 1/2 (50 %)                  | 0/1 (0%)                         |

239 <sup>1</sup> determined by histopathology

240 <sup>2</sup> determined by immunohistochemistry

241 <sup>3</sup> number of positive animals / number of total animals (positive animals %); n.d. = not done

242

243 **Supplemental table 2: Animal numbers used within the inoculation experiment of**  
 244 **poultry with DE-H5N8A / DE-H5N8B**

|          | adult                  |                                                             |         |       |                                                      |         | duckling (IMPI) |              |
|----------|------------------------|-------------------------------------------------------------|---------|-------|------------------------------------------------------|---------|-----------------|--------------|
|          | peking duck inoculated | sentinel birds in direct contact to inoculated peking ducks |         | geese | sentinel birds in direct contact to inoculated geese |         | peking duck     | muscovy duck |
|          |                        | ducks                                                       | chicken |       | geese                                                | chicken |                 |              |
| DE-H5N8A | 10                     | 2                                                           | 4       | 10    | 2                                                    | 4       | 10              | 10           |
| DE-H5N8B | 10                     | 2                                                           | 10      | -     | -                                                    | -       | 10              | 10           |

245

246 **Supplemental table 3: Animal numbers used within the inoculation experiment of mice**  
 247 **with DE-H5N8B**

|                   | dosage group    |                 |                 |                 |                 |         |
|-------------------|-----------------|-----------------|-----------------|-----------------|-----------------|---------|
|                   | 10 <sup>2</sup> | 10 <sup>3</sup> | 10 <sup>4</sup> | 10 <sup>5</sup> | 10 <sup>6</sup> | Control |
| MLD <sub>50</sub> | 5               | 5               | 5               | 5               | 5               | 3       |
| 3 dpi*            | 3               | 3               | 3               | 3               | 3               | -       |
| 6 dpi#            | -               | 3               | -               | 3               | 3               | -       |

248 \* intended to be euthanized three days post inoculation

249 # intended to be euthanized six days post inoculation

250

251 **Supplemental table 4: Primers and probes used for a generic detection of influenza A**  
 252 **virus-specific RNA in diagnostic materials from mice and ferrets in this study.**

| Designation                                  | Sequence<br>5' ⇒ 3'                  | Concentration of primer<br>and probes in the<br>primer-probe-mix |
|----------------------------------------------|--------------------------------------|------------------------------------------------------------------|
| <i>Pan-IAV assay</i>                         |                                      |                                                                  |
| <b>IAV-PB1</b>                               | <b>(this study)</b>                  |                                                                  |
| IAV-PB1_120F                                 | CATTTGAATGGAYGTCAAYCCGA              | 20 μM                                                            |
| IAV-PB1_271R                                 | CTGTTDACYGTGTCCATDGTGTA              | 20 μM                                                            |
| IAV-PB1_247as_FAM                            | FAM CCWGTGCCYGTGCCATGGCTGTA-BHQ1     | 5 μM                                                             |
| <i>internal extraction<br/>control assay</i> |                                      |                                                                  |
| <b>β-Actin Mix-HEX</b>                       | <b>(modified from <sup>10</sup>)</b> |                                                                  |
| ACT2-1030-F                                  | AGCGCAAGTACTCCGTGTG                  | 5 μM                                                             |
| ACT-1135-R                                   | CGGACTCATCGTACTCCTGCTT               | 5 μM                                                             |
| ACT-1081-HEX                                 | HEX-TCGCTGTCCACCTCCAGCAGATGT-BHQ1    | 2.5 μM                                                           |

253

254 **Supplemental references**

- 255 1 Commission, E. 2006/437/EC: Commission Decision of 4 August 2006 approving a Diagnostic  
256 Manual for avian influenza as provided for in Council Directive 2005/94/EC. Report No. ISSN  
257 1725-2555, 16 (2006).
- 258 2 Spearman, C. The Method of "Right and Wrong Cases" (Constant Stimuli) without Gauss's  
259 Formula. *Br J Psychol* **2**, 227-242, doi:10.1037/h0063767 (1908).
- 260 3 Kärber, G. Beitrag zur kollektiven Behandlung pharmakologischer Reihenversuche. *Archiv f*  
261 *experiment Pathol u Pharmakol* **162**, 480-483, doi:10.1007/BF01863914 (1931).
- 262 4 Hoffmann, B. *et al.* New real-time reverse transcriptase polymerase chain reactions facilitate  
263 detection and differentiation of novel A/H1N1 influenza virus in porcine and human samples.  
264 *Berl Munch Tierarztl Wochenschr* **123**, 286-292 (2010).
- 265 5 Klopffleisch, R., Werner, O., Mundt, E., Harder, T. & Teifke, J. P. Neurotropism of highly  
266 pathogenic avian influenza virus A/chicken/Indonesia/2003 (H5N1) in experimentally  
267 infected pigeons (*Columba livia f. domestica*). *Vet Pathol* **43**, 463-470, doi:10.1354/vp.43-4-  
268 463 (2006).
- 269 6 Pohlmann, A. *et al.* Outbreaks among Wild Birds and Domestic Poultry Caused by Reassorted  
270 Influenza A(H5N8) Clade 2.3.4.4 Viruses, Germany, 2016. *Emerg Infect Dis* **23**, 633-636,  
271 doi:10.3201/eid2304.161949 (2017).
- 272 7 Hocke, A. C. *et al.* Emerging human middle East respiratory syndrome coronavirus causes  
273 widespread infection and alveolar damage in human lungs. *Am J Respir Crit Care Med* **188**,  
274 882-886, doi:10.1164/rccm.201305-0954LE (2013).
- 275 8 Weinheimer, V. K. *et al.* Influenza A viruses target type II pneumocytes in the human lung. *J*  
276 *Infect Dis* **206**, 1685-1694, doi:10.1093/infdis/jis455 (2012).
- 277 9 Berg, J. *et al.* Tyk2 as a target for immune regulation in human viral/bacterial pneumonia. *Eur*  
278 *Respir J* **50**, doi:10.1183/13993003.01953-2016 (2017).
- 279 10 Toussaint, J. F. *et al.* Bluetongue in Belgium, 2006. *Emerg Infect Dis* **13**, 614-616,  
280 doi:10.3201/eid1304.061136 (2007).

281

282

Figure S1

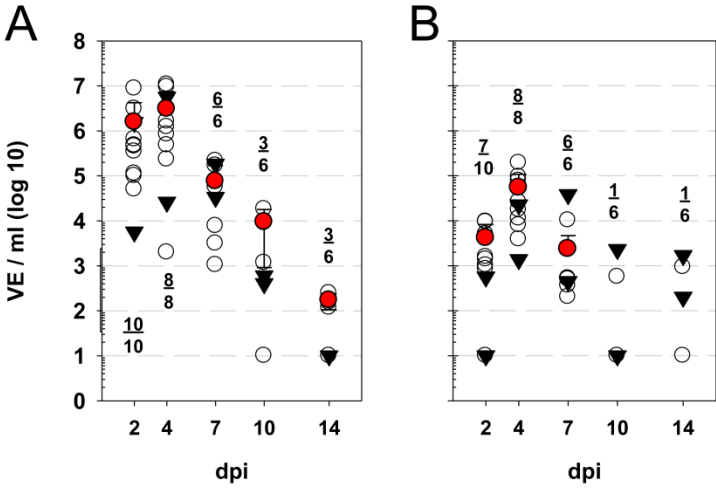

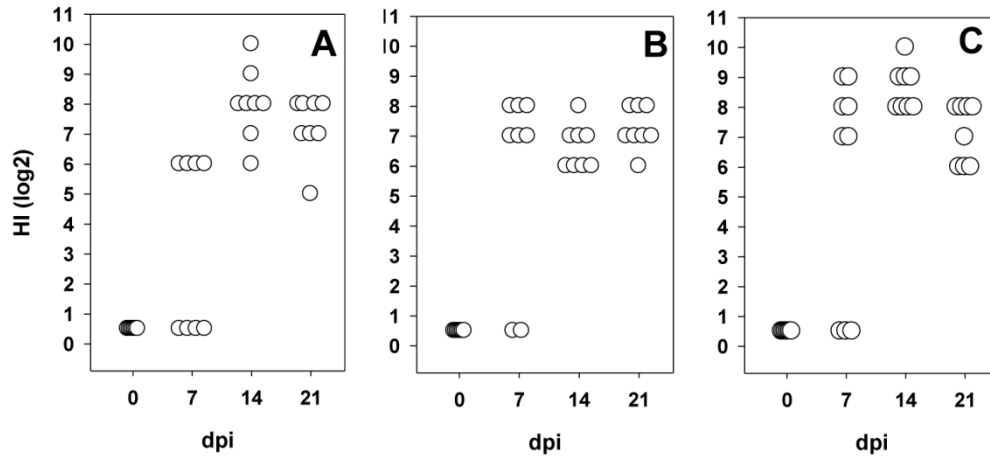

286

287

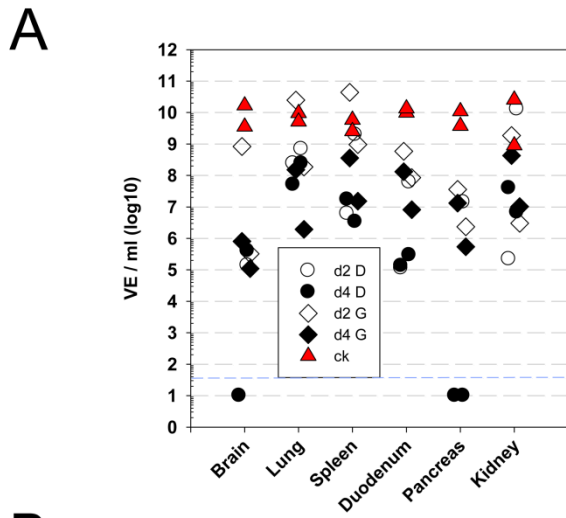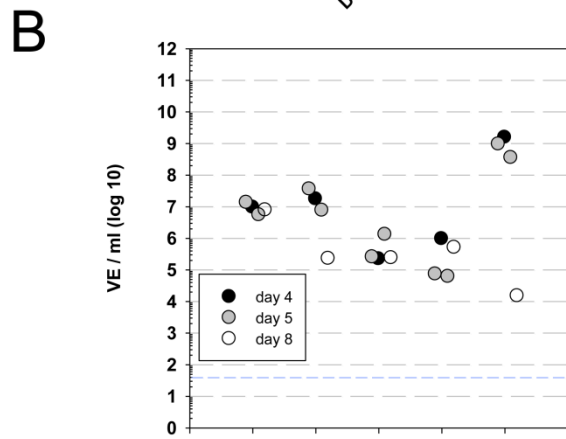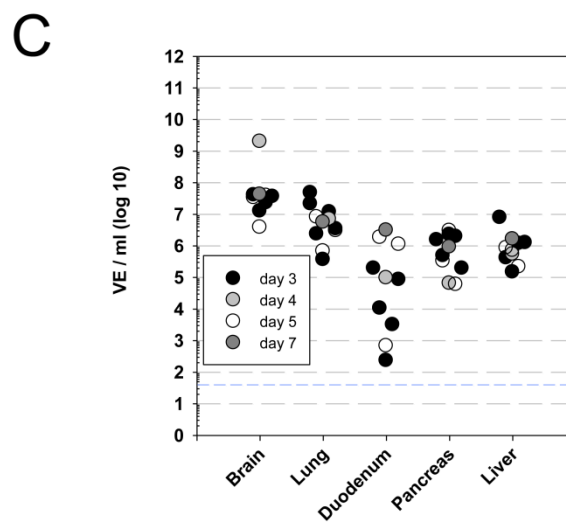



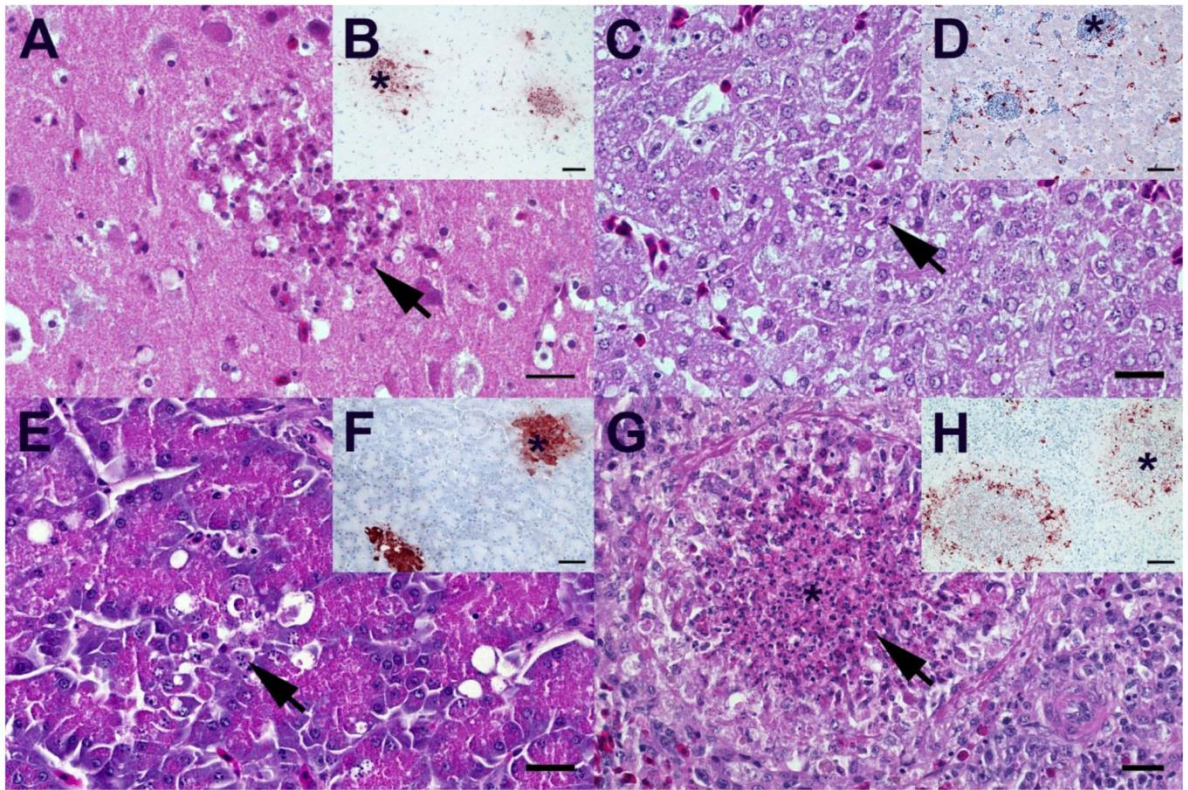

Supplement: 41426_2018_130_MOESM1_ESM.pdf [file 41426_2018_130_MOESM1_ESM.pdf]
